# Supplementary material
Source: publisher site journal article supplement (https://www.spandidos-publications.com/1039/downloadSupplementary)

Figure S1. Images show improved skin conditions of the right-side face (PRP injected), measuring the spots, red area, pore, texture, wrinkles, UV spots, porphyrins and brown spots compared with the left-side face (without PRP treatment) from week 0 to week 6. PRP, platelet-rich plasma; UV, ultraviolet.

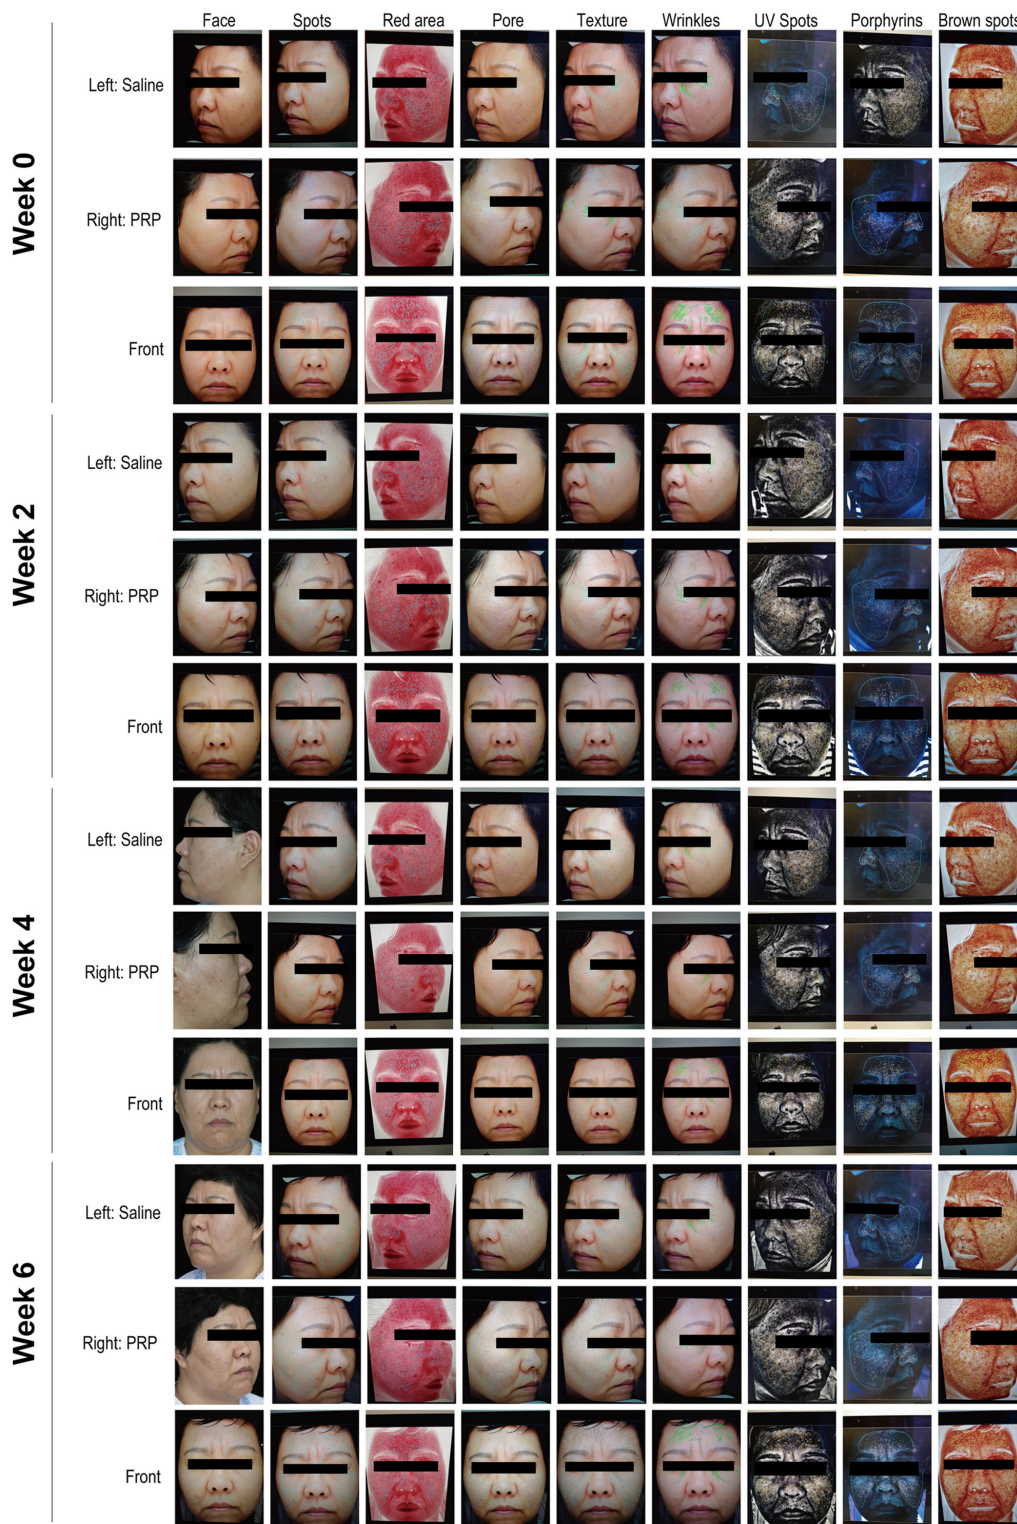

Supplement: Supplementary file 1 [file downloadSupplementary]
